# Supplementary material
Source: Elsevier journal article supplement (https://comptes-rendus.academie-sciences.fr/chimie/article/10.1016/j.crci.2011.11.014/file/attach/mmc1.pdf)
Supplement: mmc1 [file mmc1.pdf]

## Supporting Information

### Models for The Trinuclear Copper(II) Cluster in the Particulate Methane Monooxygenase from Methanotrophic Bacteria: Synthesis, Spectroscopic and Theoretical Characterization of Trinuclear Cu(II) Complexes

Isiah Po-Chun Liu, Peter Ping-Yu Chen\*, Sunney I. Chan\*

Institute of Chemistry, Academia Sinica, Taipei, Taiwan ROC

---

#### Addresses:

Dr. Isiah Po-Chun Liu  
Department of Chemistry  
National Taiwan University  
No. 1, Sec. 4, Roosevelt Road  
Taipei 10677  
Taiwan (Republic of China)  
Email: [isiahliu@yahoo.com.tw](mailto:isiahliu@yahoo.com.tw)

Prof. Peter P.-Y. Chen  
Department of Chemistry  
National Taiwan Normal University  
No. 88, Sec. 4, Ting-Chow Road  
Taipei 11677  
Taiwan (Republic of China)  
E-mail: [peterchen@ntnu.edu.tw](mailto:peterchen@ntnu.edu.tw)

Prof. Sunney I. Chan  
Institute of Chemistry  
Academia Sinica  
128, Sec. 2, Academia Road  
Nankang, Taipei 11529  
Taiwan (Republic of China)  
E-mail: [sunneychan@yahoo.com](mailto:sunneychan@yahoo.com)

**Table S1.** Compositions of the atomic orbitals in the principal molecular orbitals for model compound **2** ( $S = 3/2$ ).

| Orb.                | Energy (eV) | Occ. | Primary Contributors SFO (percent)                                                                                                                                                                                                                                |
|---------------------|-------------|------|-------------------------------------------------------------------------------------------------------------------------------------------------------------------------------------------------------------------------------------------------------------------|
| (a) $\alpha$ - Spin |             |      |                                                                                                                                                                                                                                                                   |
| 117                 | -18.9654    | 1.00 | Br <sub>4</sub> (P:z)(15.8), Cu <sub>3</sub> (D:xy)(13.2), Br <sub>5</sub> (P:z)(11.0), Cu <sub>2</sub> (D:x <sup>2</sup> -y <sup>2</sup> )(10.7), Cu <sub>1</sub> (D:x <sup>2</sup> -y <sup>2</sup> )(9.3),                                                      |
| 118                 | -18.8671    | 1.00 | Cu <sub>3</sub> (D:z <sup>2</sup> )(13.4), Br <sub>4</sub> (P:y)(12.9), Cu <sub>2</sub> (D:z <sup>2</sup> )(8.1), Br <sub>5</sub> (P:y)(6.9), Cu <sub>1</sub> (D:x <sup>2</sup> -y <sup>2</sup> )(6.5),                                                           |
| 119                 | -18.8657    | 1.00 | Cu <sub>1</sub> (D:z <sup>2</sup> )(14.4), Br <sub>4</sub> (P:x)(12.8), Br <sub>5</sub> (P:x)(7.0), Cu <sub>2</sub> (D:z <sup>2</sup> )(6.6), Cu <sub>3</sub> (D:xy)(6.6), Cu <sub>1</sub> (D:yz)(5.0),                                                           |
| 120                 | -18.7048    | 1.00 | Cu <sub>3</sub> (D:x <sup>2</sup> -y <sup>2</sup> )(14.7), Cu <sub>1</sub> (D:xy)(11.3), Cu <sub>2</sub> (D:xy)(11.1),                                                                                                                                            |
| 121                 | -18.1009    | 1.00 | O <sub>16</sub> (P:x)(10.6), O <sub>21</sub> (P:z)(8.7), O <sub>21</sub> (P:y)(8.3), O <sub>32</sub> (P:y)(8.2), O <sub>16</sub> (P:z)(8.2), O <sub>32</sub> (P:z)(8.1),                                                                                          |
| 122                 | -17.8776    | 1.00 | O <sub>21</sub> (P:z)(13.3), O <sub>21</sub> (P:y)(12.1), O <sub>32</sub> (P:z)(5.7),                                                                                                                                                                             |
| 123                 | -17.8741    | 1.00 | O <sub>16</sub> (P:x)(15.1), O <sub>16</sub> (P:z)(12.2), O <sub>32</sub> (P:y)(9.1), O <sub>32</sub> (P:z)(8.5),                                                                                                                                                 |
| 124                 | -17.4312    | 1.00 | Cu <sub>3</sub> (D:yz)(15.2), Br <sub>4</sub> (P:y)(8.5), Br <sub>5</sub> (P:y)(8.5), N <sub>11</sub> (P:y)(5.8), N <sub>10</sub> (P:y)(5.5),                                                                                                                     |
| 125                 | -17.4306    | 1.00 | Br <sub>4</sub> (P:x)(8.5), Br <sub>5</sub> (P:x)(8.5), Cu <sub>2</sub> (D:xz)(8.4), Cu <sub>1</sub> (D:xz)(7.1),                                                                                                                                                 |
| 126                 | -17.2292    | 1.00 | Br <sub>5</sub> (P:z)(10.8), Br <sub>4</sub> (P:z)(10.7), Cu <sub>3</sub> (D:yz)(9.4), Cu <sub>2</sub> (D:xz)(7.1), Cu <sub>1</sub> (D:xz)(7.0),                                                                                                                  |
| 127                 | -12.5511    | 0.00 | Cu <sub>3</sub> (S)(14.6), Cu <sub>2</sub> (S)(14.6), Cu <sub>1</sub> (S)(14.3), Cu <sub>1</sub> (S)(6.5), Cu <sub>3</sub> (S)(6.4), Cu <sub>2</sub> (S)(6.4),                                                                                                    |
| 128                 | -12.0208    | 0.00 | Cu <sub>1</sub> (S)(24.7), Cu <sub>3</sub> (S)(8.5), Cu <sub>2</sub> (P:y)(7.0), Cu <sub>3</sub> (P:x)(5.2),                                                                                                                                                      |
| 129                 | -12.0169    | 0.00 | Cu <sub>2</sub> (S)(20.9), Cu <sub>3</sub> (S)(16.5), Cu <sub>1</sub> (P:y)(6.7),                                                                                                                                                                                 |
| 130                 | -11.6636    | 0.00 | H <sub>52</sub> (S)(6.0), H <sub>54</sub> (S)(6.0), H <sub>38</sub> (S)(5.9), H <sub>53</sub> (S)(5.7), H <sub>51</sub> (S)(5.7), H <sub>33</sub> (S)(5.6), Cu <sub>3</sub> (P:z)(5.4), Cu <sub>2</sub> (P:z)(5.4), Cu <sub>1</sub> (P:z)(5.3),                   |
| (b) $\beta$ - Spin  |             |      |                                                                                                                                                                                                                                                                   |
| 114                 | -18.9928    | 1.00 | Cu <sub>3</sub> (D:xz)(19.9), Cu <sub>2</sub> (D:yz)(16.0), Cu <sub>1</sub> (D:yz)(13.9), Cu <sub>1</sub> (D:xz)(6.2),                                                                                                                                            |
| 115                 | -18.7729    | 1.00 | Cu <sub>3</sub> (D:xz)(18.9), Cu <sub>3</sub> (D:x <sup>2</sup> -y <sup>2</sup> )(8.3), Br <sub>5</sub> (P:x)(6.0), Cu <sub>2</sub> (D:x <sup>2</sup> -y <sup>2</sup> )(5.3),                                                                                     |
| 116                 | -18.7710    | 1.00 | Cu <sub>2</sub> (D:yz)(12.1), Cu <sub>1</sub> (D:yz)(8.6), Cu <sub>1</sub> (D:xy)(7.7), Cu <sub>2</sub> (D:xy)(6.1), Br <sub>5</sub> (P:y)(6.1),                                                                                                                  |
| 117                 | -18.6937    | 1.00 | Cu <sub>3</sub> (D:xy)(14.7), Br <sub>4</sub> (P:z)(14.1), Cu <sub>2</sub> (D:x <sup>2</sup> -y <sup>2</sup> )(12.1), Cu <sub>1</sub> (D:x <sup>2</sup> -y <sup>2</sup> )(10.2), Br <sub>5</sub> (P:z)(9.6),                                                      |
| 118                 | -18.6136    | 1.00 | Cu <sub>3</sub> (D:z <sup>2</sup> )(16.1), Br <sub>4</sub> (P:y)(12.1), Cu <sub>2</sub> (D:z <sup>2</sup> )(9.4), Cu <sub>1</sub> (D:x <sup>2</sup> -y <sup>2</sup> )(7.8), Br <sub>5</sub> (P:y)(7.0), Cu <sub>2</sub> (D:x <sup>2</sup> -y <sup>2</sup> )(5.8), |
| 119                 | -18.6121    | 1.00 | Cu <sub>1</sub> (D:z <sup>2</sup> )(17.0), Br <sub>4</sub> (P:x)(12.1), Cu <sub>3</sub> (D:xy)(8.6), Cu <sub>2</sub> (D:z <sup>2</sup> )(8.1), Br <sub>5</sub> (P:x)(7.0), Cu <sub>1</sub> (D:yz)(5.4),                                                           |
| 120                 | -18.4472    | 1.00 | Cu <sub>3</sub> (D:x <sup>2</sup> -y <sup>2</sup> )(15.6), Cu <sub>1</sub> (D:xy)(12.0), Cu <sub>2</sub> (D:xy)(11.7),                                                                                                                                            |
| 121                 | -18.0659    | 1.00 | O <sub>16</sub> (P:x)(10.7), O <sub>21</sub> (P:z)(8.7), O <sub>32</sub> (P:y)(8.4), O <sub>16</sub> (P:z)(8.3), O <sub>32</sub> (P:z)(8.3), O <sub>21</sub> (P:y)(8.1),                                                                                          |
| 122                 | -17.7757    | 1.00 | O <sub>21</sub> (P:z)(13.2), O <sub>21</sub> (P:y)(11.4), O <sub>32</sub> (P:z)(7.2), O <sub>32</sub> (P:y)(5.7), Cu <sub>3</sub> (D:x <sup>2</sup> -y <sup>2</sup> )(5.5),                                                                                       |
| 123                 | -17.7723    | 1.00 | O <sub>16</sub> (P:x)(16.1), O <sub>16</sub> (P:z)(13.5), O <sub>32</sub> (P:y)(7.8), O <sub>32</sub> (P:z)(7.3),                                                                                                                                                 |
| 124                 | -16.8598    | 0.00 | Cu <sub>3</sub> (D:yz)(20.1), Br <sub>4</sub> (P:y)(7.9), Cu <sub>1</sub> (D:xz)(7.8), Br <sub>5</sub> (P:y)(7.2), N <sub>11</sub> (P:y)(5.4), N <sub>10</sub> (P:y)(5.1),                                                                                        |
| 125                 | -16.8589    | 0.00 | Cu <sub>2</sub> (D:xz)(12.8), Cu <sub>1</sub> (D:xz)(8.1), Br <sub>4</sub> (P:x)(7.9), Br <sub>5</sub> (P:x)(7.2), Cu <sub>2</sub> (D:yz)(5.6), N <sub>9</sub> (P:x)(5.0),                                                                                        |
| 126                 | -16.6157    | 0.00 | Cu <sub>3</sub> (D:yz)(11.8), Br <sub>5</sub> (P:z)(9.3), Br <sub>4</sub> (P:z)(9.2), Cu <sub>1</sub> (D:xz)(8.9), Cu <sub>2</sub> (D:xz)(8.8),                                                                                                                   |
| 127                 | -12.4694    | 0.00 | Cu <sub>3</sub> (S)(13.6), Cu <sub>2</sub> (S)(13.5), Cu <sub>1</sub> (S)(13.3), Cu <sub>1</sub> (S)(6.9), Cu <sub>3</sub> (S)(6.9), Cu <sub>2</sub> (S)(6.8),                                                                                                    |

**Table S2.** Compositions of the atomic orbitals in the principal molecular orbitals for model compound **3** ( $S = 3/2$ ).

| Orb.                | Energy (eV) | Occ. | Primary Contributors SFO (percent)                                                                                                                                                                                                                                                                  |
|---------------------|-------------|------|-----------------------------------------------------------------------------------------------------------------------------------------------------------------------------------------------------------------------------------------------------------------------------------------------------|
| (a) $\alpha$ - Spin |             |      |                                                                                                                                                                                                                                                                                                     |
| 107                 | -19.0551    | 1.00 | Cu <sub>3</sub> (D:xz)(24.0), Cu <sub>1</sub> (D:yz)(8.2), Cu <sub>2</sub> (D:xz)(7.8), Cu <sub>3</sub> (D:yz)(7.7),                                                                                                                                                                                |
| 108                 | -18.8186    | 1.00 | Cu <sub>1</sub> (D:xy)(13.1), Cu <sub>3</sub> (D:xy)(13.0), Cu <sub>2</sub> (D:xy)(11.8),<br>Cu <sub>3</sub> (D:z <sup>2</sup> )(11.1), O <sub>11</sub> (P:y)(5.2),                                                                                                                                 |
| 109                 | -18.8045    | 1.00 | Cu <sub>3</sub> (D:x <sup>2</sup> -y <sup>2</sup> )(15.2), Cu <sub>2</sub> (D:x <sup>2</sup> -y <sup>2</sup> )(15.0), Cu <sub>1</sub> (D:x <sup>2</sup> -y <sup>2</sup> )(10.0),<br>Cu <sub>1</sub> (D:z <sup>2</sup> )(9.0), Cu <sub>2</sub> (D:z <sup>2</sup> )(6.7), O <sub>11</sub> (P:x)(6.2), |
| 110                 | -18.5111    | 1.00 | Cu <sub>1</sub> (D:x <sup>2</sup> -y <sup>2</sup> )(15.9), Cu <sub>3</sub> (D:xy)(12.1), Cu <sub>2</sub> (D:xy)(11.9),                                                                                                                                                                              |
| 111                 | -18.2162    | 1.00 | O <sub>14</sub> (P:y)(11.7), O <sub>13</sub> (P:x)(10.2), O <sub>12</sub> (P:x)(8.7), O <sub>13</sub> (P:z)(7.4),<br>O <sub>14</sub> (P:z)(6.2), O <sub>12</sub> (P:z)(6.2),                                                                                                                        |
| 112                 | -17.9038    | 1.00 | O <sub>13</sub> (P:x)(13.2), O <sub>13</sub> (P:z)(10.2), O <sub>14</sub> (P:y)(5.9), Cu <sub>1</sub> (D:x <sup>2</sup> -y <sup>2</sup> )(5.4),                                                                                                                                                     |
| 113                 | -17.8624    | 1.00 | O <sub>14</sub> (P:y)(14.2), O <sub>12</sub> (P:x)(12.6), O <sub>12</sub> (P:z)(8.5), O <sub>14</sub> (P:z)(8.1),<br>Cu <sub>3</sub> (D:xy)(6.1),                                                                                                                                                   |
| 114                 | -17.5282    | 1.00 | Cu <sub>1</sub> (D:xz)(10.2), Cu <sub>2</sub> (D:yz)(8.0), Cu <sub>3</sub> (D:yz)(7.7),                                                                                                                                                                                                             |
| 115                 | -17.2296    | 1.00 | Cu <sub>1</sub> (D:xz)(15.6), Cu <sub>2</sub> (D:yz)(13.1), O <sub>11</sub> (P:x)(6.8),                                                                                                                                                                                                             |
| 116                 | -17.1703    | 1.00 | Cu <sub>3</sub> (D:yz)(15.9), O <sub>11</sub> (P:y)(6.8), N <sub>8</sub> (P:y)(5.9), Cu <sub>1</sub> (D:xz)(5.3),<br>Cu <sub>3</sub> (D:xz)(5.2),                                                                                                                                                   |
| 117                 | -13.1709    | 0.00 | Cu <sub>2</sub> (S)(10.8), Cu <sub>1</sub> (S)(10.7), H <sub>48</sub> (S)(10.7), H <sub>47</sub> (S)(10.2),<br>Cu <sub>3</sub> (S)(9.3),<br>Cu <sub>2</sub> (S)(6.4), Cu <sub>1</sub> (S)(6.3), Cu <sub>3</sub> (S)(5.7),                                                                           |
| 118                 | -12.4739    | 0.00 | H <sub>47</sub> (S)(11.7), H <sub>48</sub> (S)(11.0),                                                                                                                                                                                                                                               |
| 119                 | -11.8372    | 0.00 | Cu <sub>3</sub> (S)(20.8), Cu <sub>3</sub> (S)(11.2), Cu <sub>2</sub> (S)(6.1),                                                                                                                                                                                                                     |
| 120                 | -11.8168    | 0.00 | Cu <sub>1</sub> (S)(17.0), Cu <sub>2</sub> (S)(15.2), Cu <sub>1</sub> (S)(8.3), Cu <sub>2</sub> (S)(7.7),                                                                                                                                                                                           |
| (b) $\beta$ - Spin  |             |      |                                                                                                                                                                                                                                                                                                     |
| 104                 | -18.8869    | 1.00 | Cu <sub>1</sub> (D:yz)(22.1), Cu <sub>3</sub> (D:xz)(19.5), Cu <sub>2</sub> (D:xz)(18.9),<br>Cu <sub>3</sub> (D:yz)(8.2),<br>Cu <sub>2</sub> (D:yz)(5.8),                                                                                                                                           |
| 105                 | -18.8092    | 1.00 | Cu <sub>1</sub> (D:xy)(15.2), Cu <sub>1</sub> (D:yz)(14.2), Cu <sub>2</sub> (D:x <sup>2</sup> -y <sup>2</sup> )(11.2),<br>Cu <sub>3</sub> (D:x <sup>2</sup> -y <sup>2</sup> )(10.2), Cu <sub>2</sub> (D:xz)(9.9), Cu <sub>3</sub> (D:xy)(5.0),                                                      |
| 106                 | -18.7942    | 1.00 | Cu <sub>1</sub> (D:yz)(16.2), Cu <sub>2</sub> (D:yz)(11.6), Cu <sub>3</sub> (D:x <sup>2</sup> -y <sup>2</sup> )(10.4),<br>Cu <sub>2</sub> (D:xz)(9.3),<br>Cu <sub>1</sub> (D:xy)(5.8), Cu <sub>2</sub> (D:x <sup>2</sup> -y <sup>2</sup> )(5.0),                                                    |
| 107                 | -18.7302    | 1.00 | Cu <sub>3</sub> (D:xz)(27.6), Cu <sub>1</sub> (D:yz)(10.4), Cu <sub>3</sub> (D:yz)(9.1), Cu <sub>2</sub> (D:xz)(8.7),                                                                                                                                                                               |
| 108                 | -18.5042    | 1.00 | Cu <sub>1</sub> (D:xy)(15.8), Cu <sub>3</sub> (D:z <sup>2</sup> )(12.4), Cu <sub>2</sub> (D:xy)(9.7), Cu <sub>3</sub> (D:xy)(7.7),<br>Cu <sub>2</sub> (D:x <sup>2</sup> -y <sup>2</sup> )(6.2), O <sub>11</sub> (P:y)(5.7),                                                                         |
| 109                 | -18.4674    | 1.00 | Cu <sub>3</sub> (D:x <sup>2</sup> -y <sup>2</sup> )(17.0), Cu <sub>2</sub> (D:x <sup>2</sup> -y <sup>2</sup> )(13.6), Cu <sub>1</sub> (D:z <sup>2</sup> )(8.0),<br>Cu <sub>2</sub> (D:z <sup>2</sup> )(7.7), Cu <sub>1</sub> (D:xy)(7.0), O <sub>11</sub> (P:x)(6.5), Cu <sub>3</sub> (D:xy)(5.0),  |
| 110                 | -18.2052    | 1.00 | Cu <sub>1</sub> (D:x <sup>2</sup> -y <sup>2</sup> )(16.2), Cu <sub>3</sub> (D:xy)(12.7), Cu <sub>2</sub> (D:xy)(9.9),                                                                                                                                                                               |
| 111                 | -18.1817    | 1.00 | O <sub>14</sub> (P:y)(10.0), O <sub>13</sub> (P:x)(9.6), O <sub>12</sub> (P:x)(6.6), O <sub>12</sub> (P:z)(5.8),<br>O <sub>13</sub> (P:z)(5.7), O <sub>14</sub> (P:z)(5.3),                                                                                                                         |
| 112                 | -17.7782    | 1.00 | O <sub>13</sub> (P:x)(11.4), Cu <sub>1</sub> (D:x <sup>2</sup> -y <sup>2</sup> )(9.1), O <sub>13</sub> (P:z)(9.0), Cu <sub>2</sub> (D:xy)(7.2),                                                                                                                                                     |
| 113                 | -17.7327    | 1.00 | O <sub>14</sub> (P:y)(12.1), O <sub>12</sub> (P:x)(10.7), Cu <sub>3</sub> (D:xy)(10.3), O <sub>12</sub> (P:z)(7.1),<br>O <sub>14</sub> (P:z)(7.0),                                                                                                                                                  |
| 114                 | -16.7682    | 0.00 | Cu <sub>1</sub> (D:xz)(14.1), Cu <sub>2</sub> (D:yz)(11.0), Cu <sub>3</sub> (D:yz)(10.3),                                                                                                                                                                                                           |
| 115                 | -16.4709    | 0.00 | Cu <sub>1</sub> (D:xz)(20.2), Cu <sub>2</sub> (D:yz)(16.4), O <sub>11</sub> (P:x)(6.4),                                                                                                                                                                                                             |
| 116                 | -16.4011    | 0.00 | Cu <sub>3</sub> (D:yz)(20.6), Cu <sub>3</sub> (D:xz)(6.8), Cu <sub>1</sub> (D:xz)(6.5), O <sub>11</sub> (P:y)(6.5),                                                                                                                                                                                 |
| 117                 | -13.0911    | 0.00 | H <sub>48</sub> (S)(10.4), Cu <sub>2</sub> (S)(10.2), Cu <sub>1</sub> (S)(10.1), H <sub>47</sub> (S)(9.9), Cu <sub>3</sub> (S)(8.7),<br>Cu <sub>2</sub> (S)(6.8),                                                                                                                                   |
